# Supplementary material
Source: PubMed Central journal article supplement (PMC2861042)
Supplement: NIHMS191286-supplement-1.pdf [file NIHMS191286-supplement-1.pdf]

## SUPPORTING INFORMATION

### A Chemoselective $^{15}\text{N}$ Tag for Sensitive and High Resolution NMR Profiling of the Carboxyl-Containing Metabolome

Tao Ye, Huaping Mo, Narasimhamurthy Shanaiah, G. A. Nagana Gowda, Shucha Zhang  
and Daniel Raftery

Supplementary figures, tables and text:

|                       |                                                                                                                                                                                     |
|-----------------------|-------------------------------------------------------------------------------------------------------------------------------------------------------------------------------------|
| Figure S1             | Linearity of the $^{15}\text{N}$ -tagging coupled 2D heteronuclear NMR Detection.                                                                                                   |
| Figure S2             | The 1D $^1\text{H}$ NMR spectrum of a human urine sample before $^{15}\text{N}$ -ethanolamine tagging.                                                                              |
| Figure S3             | The 2D $^1\text{H}$ - $^1\text{H}$ DQF-COSY NMR spectrum of a human urine sample before $^{15}\text{N}$ -ethanolamine tagging.                                                      |
| Figure S4             | The 1D $^1\text{H}$ NMR spectrum of a human serum sample before $^{15}\text{N}$ -ethanolamine tagging.                                                                              |
| Figure S5             | 2D $^1\text{H}$ - $^{15}\text{N}$ NMR spectra obtained from the triplicate tagging and 2D NMR analysis of a split human serum sample.                                               |
| Figure S6             | The concentrations of 9 metabolites measured from the 2D $^1\text{H}$ - $^{15}\text{N}$ NMR spectra obtained from the triplicate tagging of a split human serum sample.             |
| Table S1              | Signals of carboxyl-containing metabolites that can be recognized from the 1D $^1\text{H}$ NMR spectrum of a human urine sample used in this report before $^{15}\text{N}$ tagging. |
| Table S2              | Signals of carboxyl-containing metabolites that can be recognized from the 1D $^1\text{H}$ NMR spectrum of a human serum sample used in this report before $^{15}\text{N}$ tagging. |
| Supplementary Note    | $^{15}\text{N}$ tagging efficiencies.                                                                                                                                               |
| Supplementary Methods | Additional information on sample preparation.                                                                                                                                       |

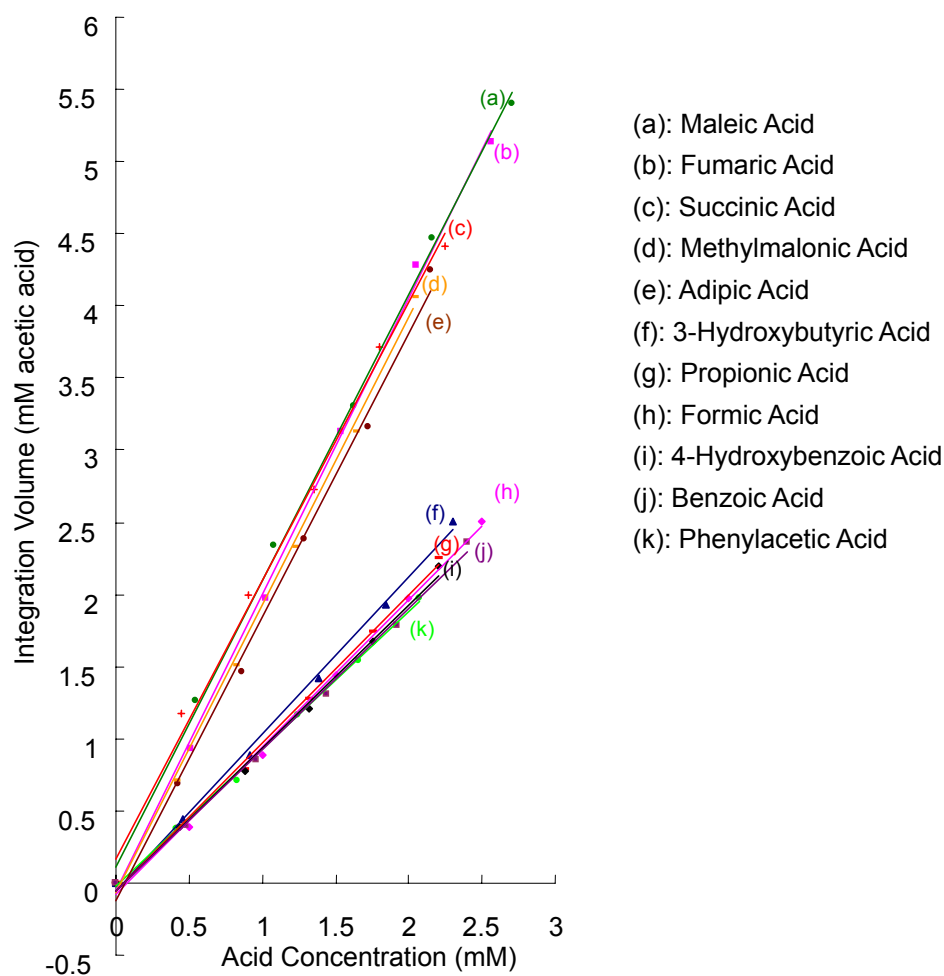

**Figure S1.** Integrated peak volumes of 11 metabolite standards in 6 mixtures from the 2D  $^1\text{H}$ - $^{15}\text{N}$  HSQC NMR spectra after  $^{15}\text{N}$ -ethanolamine tagging plotted against their original concentrations. The integrated signal volume of 1 mM tagged acetic acid (internal standard) was used as the unit for the vertical axis. The original concentrations of metabolite standards in the six samples were determined by 1D  $^1\text{H}$  NMR before conducting the  $^{15}\text{N}$ -ethanolamine tagging reactions. Best-fit lines were generated by linear least square regression. The  $^{15}\text{N}$ -ethanolamine reagent contained  $\sim 1\%$  formic acid, and thus background subtraction was done on the integrated signals of tagged formic acid in all samples. All 12 compounds (including acetic acid) were quantitatively converted into  $^{15}\text{N}$ -amides. All the metabolite signals exhibited good linearities with coefficients of regression ( $R^2$ ) greater than 0.99. The molar integrated signals (slopes of best-fit lines) for metabolites with two identical carboxyl groups were observed to be twice as large as for those with one carboxyl group because those metabolite molecules were double-tagged.

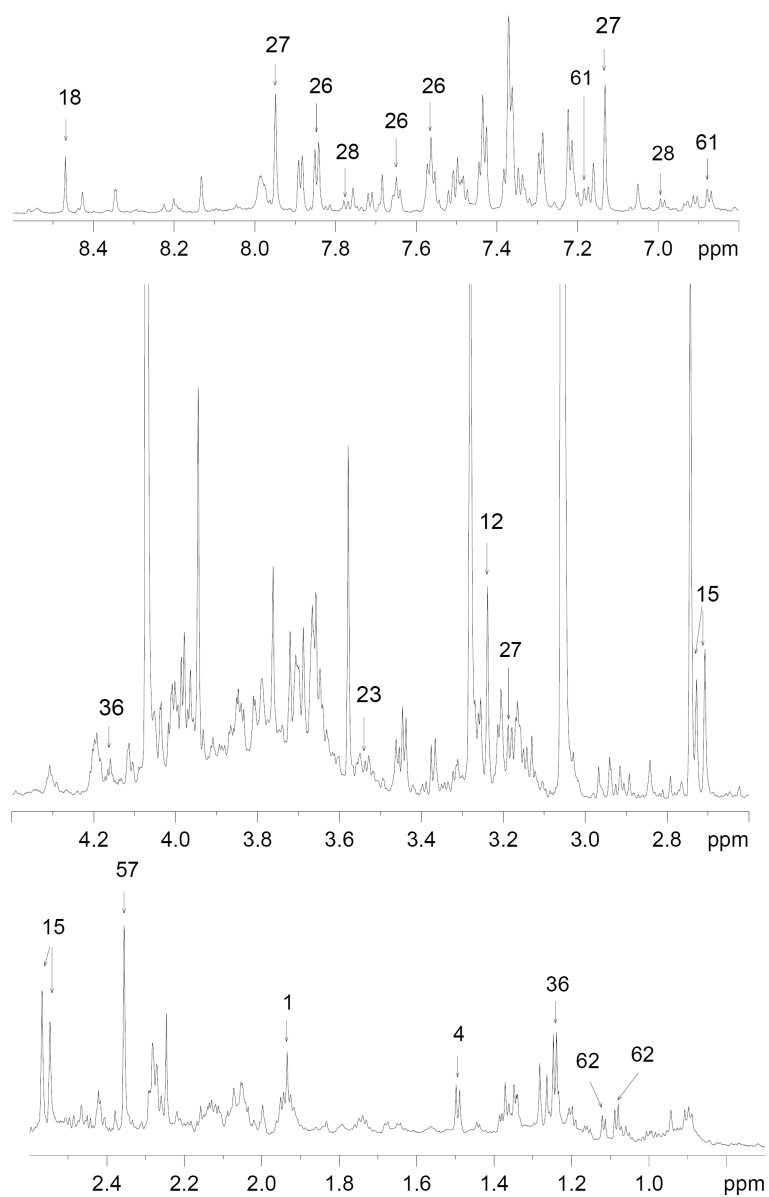

**Figure S2.** 1D  $^1\text{H}$  NMR spectrum of a human urine sample measured prior to  $^{15}\text{N}$ -ethanolamine tagging. As labeled, signals from only 13 carboxyl-containing metabolites are identifiable in the spectrum. Most of the signals are not quantifiable due to overlap. The labels correspond to the metabolite label numbers shown in Table 1 of the main text.

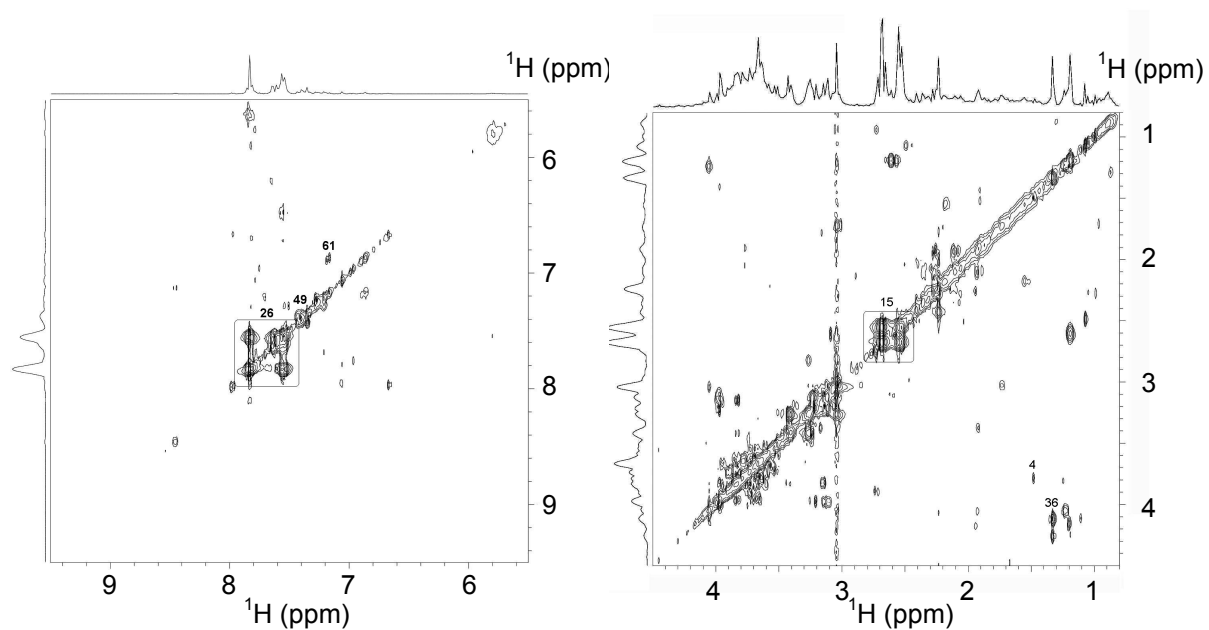

**Figure S3.** DQF-COSY spectrum of the human urine sample used for  $^{15}\text{N}$ -ethanolamine tagging and 2D NMR detection. The spectrum was acquired on a Bruker DRX-500 spectrometer at 298 K. This 2D homonuclear experiment does not significantly reduce the signal overlap and spectral complexity in the  $^1\text{H}$  dimension and thus it is difficult to detect significantly more metabolites than in the 1D spectrum.

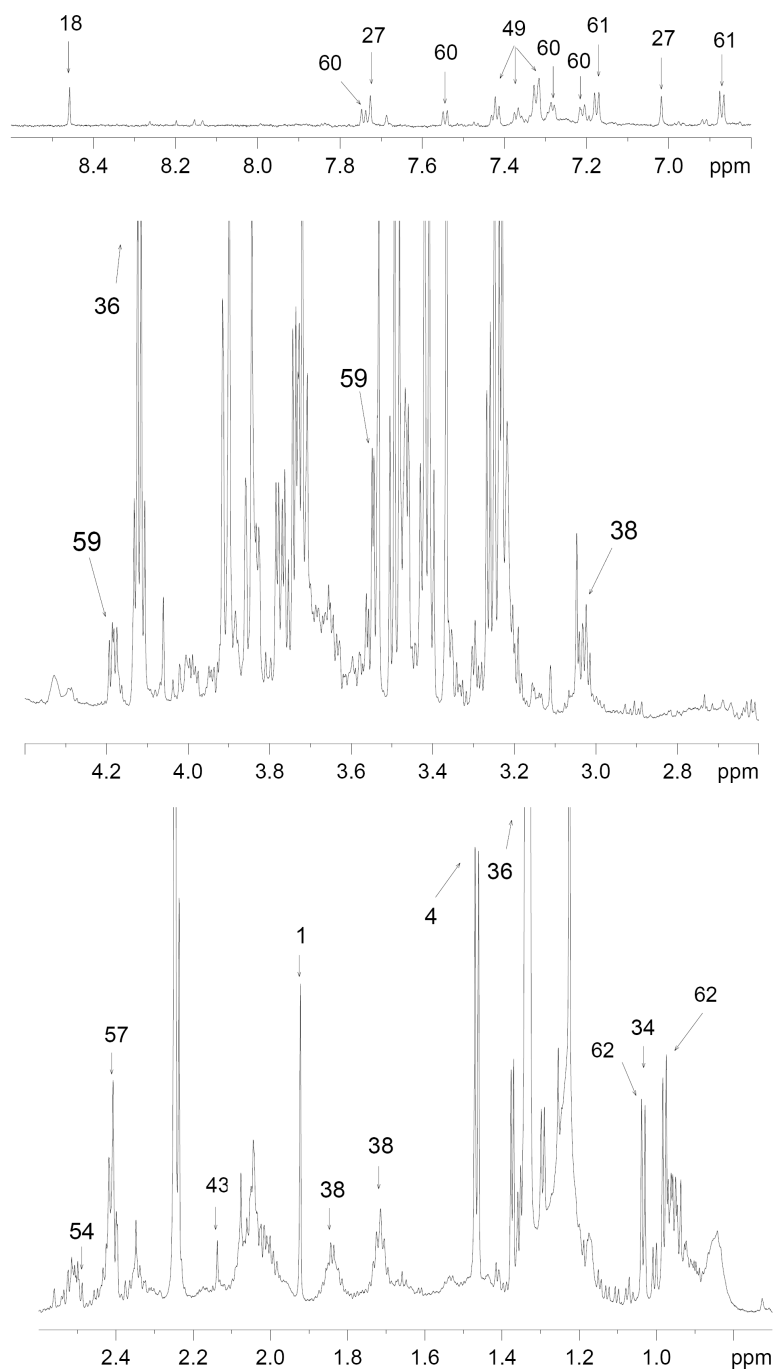

**Figure S4.** 1D  $^1\text{H}$  NMR spectrum of a human serum sample measured prior to  $^{15}\text{N}$ -ethanolamine tagging. As labeled, signals from only 15 carboxyl-containing metabolites are identifiable from the spectrum. Most of the signals are not quantifiable due to overlap. The labels correspond to the metabolite numbers shown in Table 1.

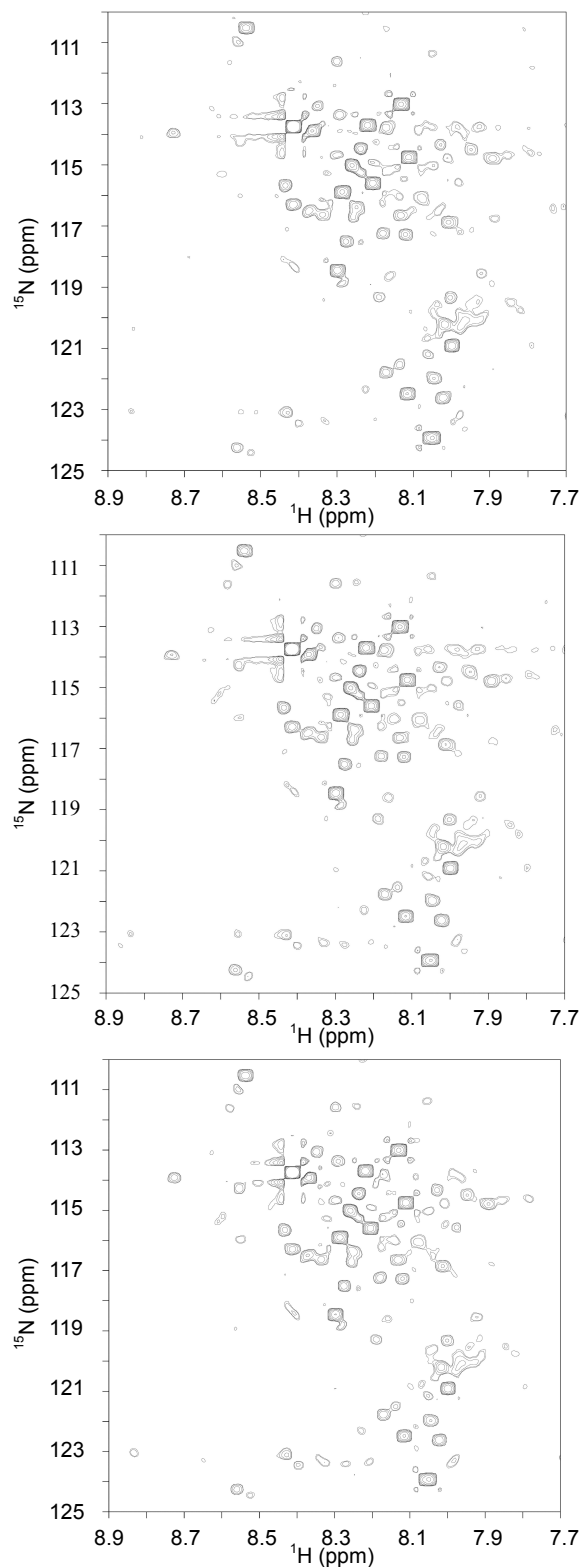

**Figure S5.** 2D HSQC NMR spectra of human serum obtained after tagging with  $^{15}\text{N}$ -ethanolamine performed in triplicate reactions. One-to-one matching of the metabolite peaks is observed in the spectra. Each spectrum was acquired on a Bruker DRX-500 spectrometer at 298 K within 30 min.

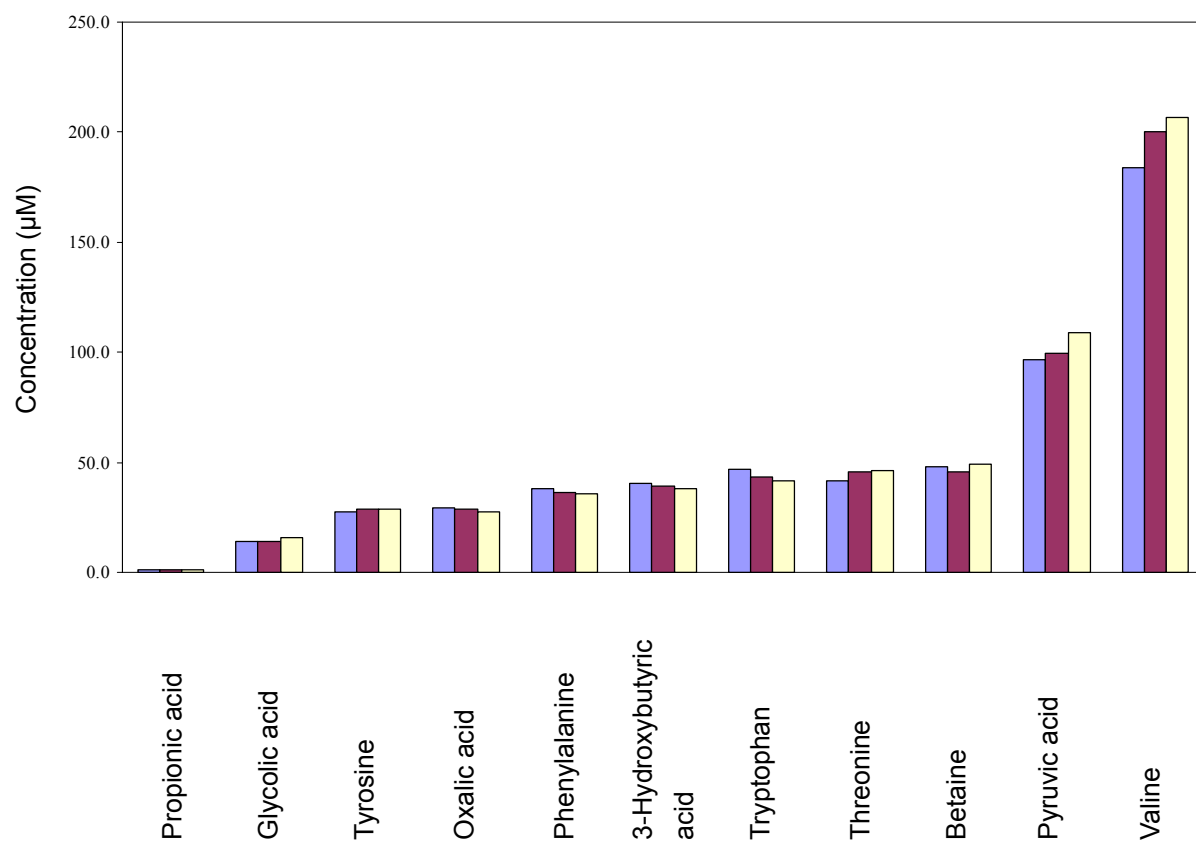

**Figure S6.** The concentrations of 9 representative carboxyl-containing metabolites in the triplicate reaction and analysis of a split serum sample measured from their 2D signal integration volumes. Metabolites from the same split sample are represented by the same color.

**Table S1.** Signals of carboxyl-containing metabolites that can be identified from the 1D  $^1\text{H}$  NMR spectrum of the human urine sample used in this report before  $^{15}\text{N}$  tagging. Abbreviations: s: singlet; d: doublet; q: quartet; O: the signal overlap other signals; I: the signal is identifiable; Q: the signal is quantifiable.

| <b>Label</b> | <b>Metabolite</b>     | <b><math>^1\text{H}</math> (ppm)</b> | <b>Multiplicity</b> | <b>Shape</b> |
|--------------|-----------------------|--------------------------------------|---------------------|--------------|
| <b>1</b>     | Acetic Acid           | 1.94                                 | s                   | O, I         |
| <b>4</b>     | L-Alanine             | 1.49                                 | d                   | I, Q         |
| <b>12</b>    | Betaine               | 3.24                                 | s                   | O, I         |
| <b>15</b>    | Citric Acid           | 2.58                                 | d                   | I, Q         |
|              |                       | 2.71                                 | d                   | O, I         |
| <b>18</b>    | Formic Acid           | 8.47                                 | s                   | I, Q         |
| <b>23</b>    | Glycine               | 3.54                                 | s                   | O, I         |
| <b>26</b>    | Hippuric Acid         | 7.56                                 | t                   | I, Q         |
|              |                       | 7.64                                 | t                   | I, Q         |
|              |                       | 7.84                                 | d                   | I, Q         |
| <b>27</b>    | L-Histidine           | 3.18                                 | ABX                 | O, I         |
|              |                       | 7.13                                 | s                   | I, Q         |
|              |                       | 7.95                                 | s                   | O, I         |
| <b>28</b>    | 4-Hydroxybenzoic Acid | 6.99                                 | d                   | I, Q         |
|              |                       | 7.78                                 | d                   | O, I         |
| <b>36</b>    | L-Lactic Acid         | 1.34                                 | d                   | O, I         |
|              |                       | 4.12                                 | q                   | O, I         |
| <b>57</b>    | Succinic Acid         | 2.37                                 | s                   | O, I         |
| <b>61</b>    | L-Tyrosine            | 6.68                                 | d                   | I, Q         |
|              |                       | 7.18                                 | d                   | O, I         |
| <b>62</b>    | L-Valine              | 1.08                                 | d                   | O, I         |
|              |                       | 1.13                                 | d                   | I, Q         |



**Table S2.** Signals of carboxyl-containing metabolites that can be identified from the 1D  $^1\text{H}$  NMR spectrum of the human serum sample used in this report before  $^{15}\text{N}$  tagging. Abbreviations: s: singlet; d: doublet; q: quartet; O: the signal overlap other signals; I: the signal is identifiable; Q: the signal is quantifiable.

| Label | Metabolite      | $^1\text{H}$ (ppm) | Multiplicity | Shape |
|-------|-----------------|--------------------|--------------|-------|
| 1     | Acetic Acid     | 1.94               | s            | I, Q  |
| 4     | Alanine         | 1.48               | d            | I, Q  |
| 18    | Formic Acid     | 8.47               | s            | I, Q  |
| 27    | L-Histidine     | 7.02               | s            | I, Q  |
|       |                 | 7.73               | s            | O, I  |
| 34    | Isoleucine      | 1.00               | d            | O, I  |
| 36    | L-Lactic Acid   | 1.34               | d            | O, I  |
|       |                 | 4.12               | q            | I, Q  |
| 38    | L-Lysine        | 1.71               | m            | I, Q  |
|       |                 | 1.84               | m            | I, Q  |
|       |                 | 3.03               | t            | O, I  |
| 43    | L-Methionine    | 2.14               | m            | I, Q  |
| 49    | L-Phenylalanine | 7.32               | d            | O, I  |
|       |                 | 7.36               | m            | O, I  |
|       |                 | 7.42               | m            | I, Q  |
| 54    | Pyruvic Acid    | 2.47               | s            | O, I  |
| 57    | Succinic Acid   | 2.41               | s            | O, I  |
| 59    | L-Threonine     | 3.55               | d            | O, I  |
|       |                 | 4.18               | m            | O, I  |
| 60    | Tryptophan      | 7.21               | dt           | O, I  |
|       |                 | 7.28               | dt           | O, I  |
|       |                 | 7.54               | d            | I, Q  |
|       |                 | 7.74               | d            | O, I  |
| 61    | L-Tyrosine      | 6.68               | d            | I, Q  |
|       |                 | 7.18               | d            | I, Q  |
| 62    | L-Valine        | 1.08               | d            | O, I  |
|       |                 | 1.13               | d            | I, Q  |

## Supplementary Notes

### <sup>15</sup>N Tagging Efficiencies

Most normal carboxyl-containing compounds (having no strong electron-donating or withdrawing functional groups at  $\alpha$ -carbons) are converted quantitatively into <sup>15</sup>N-amides or with yields greater than 95% using an excess amount of <sup>15</sup>N-ethanolamine. It was observed that metabolites with special substitution groups on the  $\alpha$ -carbon of the carboxyl showed reduced tagging efficiencies. The tagging efficiencies for  $\alpha$ -amino acids were ~30%. Lactic acid which has an  $\alpha$ -hydroxyl group showed two signals at (8.40 ppm, 113.69 ppm) and (8.12 ppm, 112.96 ppm) with 21% and 13% tagging efficiencies respectively. Oxalic acid has two conjugated carboxyl groups and showed two signals at (8.40 ppm, 116.22 ppm) and (8.73 ppm, 113.89 ppm) with 80% and 20% tagging efficiencies, respectively. The tagging of citric acid showed three signals at (8.02 ppm, 122.59 ppm), (8.16 ppm, 121.70 ppm) and (8.17 ppm, 113.75 ppm) with tagging efficiencies of 95%, 67%, and 45%. Assignment of these three signals is still underway.

## Supplementary Methods

### Serum Deproteinization

Serum samples were mixed with methanol in a 1:2 (v / v) ratio, vortexed and then incubated at -20 °C for 20 min. The precipitated proteins were removed after centrifugation at 13,200 g for 10 min. The supernatant was dried in vacuum and re-dispersed in water.

### Evaluation of Detection Linearity

An evaluation of the linearity of the isotope tagging coupled HSQC detection was made by analyzing 12 standard metabolites including 7 compounds each containing one carboxyl group (acetic, formic, 3-hydroxybutyric, phenylacetic, benzoic, 4-hydroxybenzoic and propionic acids) and 5 compounds each containing two identical carboxyl groups (fumaric, adipic, maleic, succinic, and methylmalonic acids) in a calibration series of 6 mixtures. The integration volumes of the 2D peaks from 11 metabolites were measured relative to the internal standard (acetic acid with a fixed concentration in all 6 mixtures) and plotted against the corresponding concentrations measured by 1D <sup>1</sup>H NMR before tagging.

Stock solutions of a mixture of 11 metabolite standards (~5 mM each), 4 mM acetic acid (used as the reference) and 1:9 (v / v) <sup>15</sup>N-ethanolamine-H<sub>2</sub>O were first prepared. Six calibration samples were then prepared from the stock solutions of the acid mixture and acetic acid, keeping the acetic acid concentration fixed at 2 mM. The other 11 acids were diluted by 0 X, 2 X, 2.5 X, 3.3 X, 5 X and 10 X in concentration. The samples were then reacted with 30  $\mu$ L <sup>15</sup>N-ethanolamine solution and 21 mg DMT-MM. The concentrations

of the metabolite standards in the calibration samples were determined using integrated signals from their 1D  $^1\text{H}$  NMR spectra and then comparing with those obtained after  $^{15}\text{N}$  tagging.
